# Supplementary material for: Design and Properties of Novel Hydrophobic Natural Tea Saponin and Its Organogels
Source: MDPI journal article supplement (doi:10.3390/gels10040225), 2024-03-26
Supplement: s1 [file s1]

# Design and Properties of Novel Hydrophobic Natural Tea Saponin and Its Organogels

Maogong Wang <sup>1,†</sup>, Liuxin Yan <sup>2,†</sup>, Xuying Guo <sup>2</sup>, Xinwei Xing <sup>2</sup>, Fengqian Liang <sup>2</sup>, Chunrui Han <sup>2,\*</sup> and Liujun Liu <sup>2</sup>

<sup>1</sup> CNPC Engineering Technology R&D Company Limited, Beijing 102206, China; wangmg\_dri@cnpcc.com.cn

<sup>2</sup> MOE Engineering Research Center of Forestry Biomass Materials and Energy, Ministry of Education, Beijing Forestry University, Beijing 100083, China; yanliuxin0505@163.com (L.Y.); guoxy@bjfu.edu.cn (X.G.); yi3210319@bjfu.edu.cn (X.X.); liangfengqian7210401@bjfu.edu.cn (F.L.); lux@bjfu.edu.cn (L.L.)

\* Correspondence: hanchunrui@bjfu.edu.cn

† These authors contributed equally to this work and share first authorship.

The supporting information includes 2 figures.

Contents:

Figure S1. <sup>13</sup>C NMR of DC-TS

Figure S2. HRMS spectrum of DC-TS.

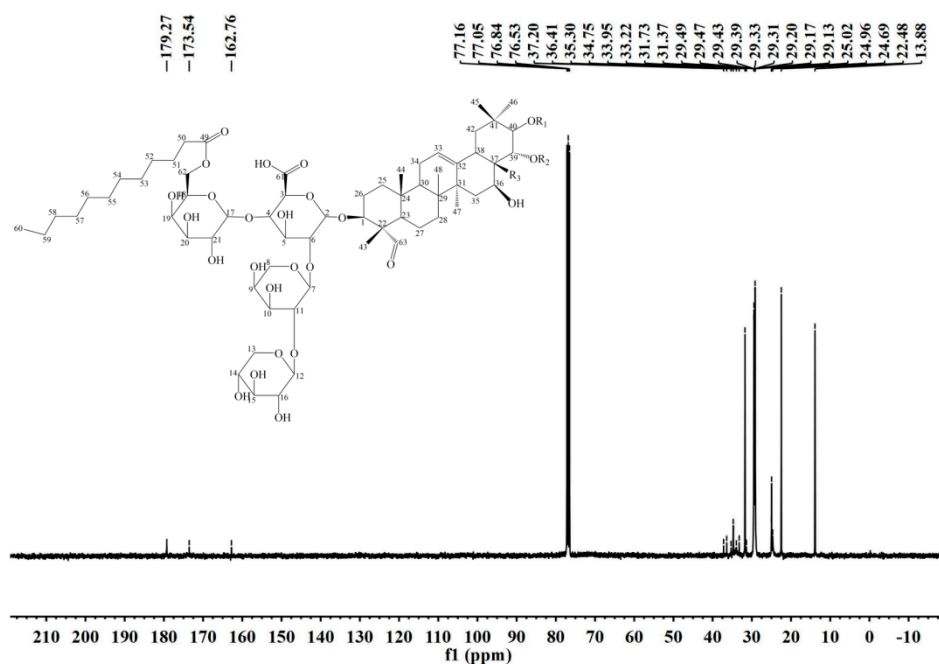

Figure S1. <sup>13</sup>C NMR of DC-TS

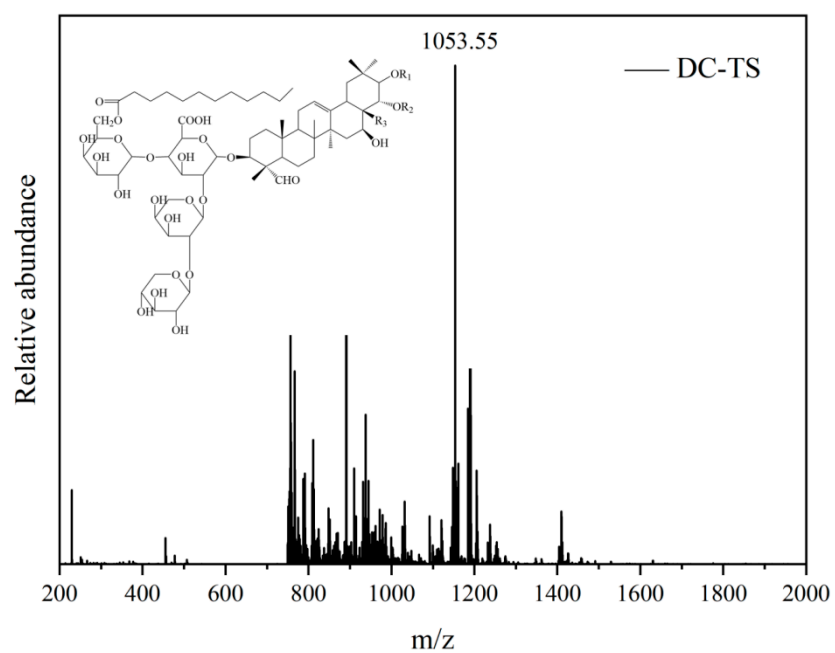

Figure S2. HRMS spectrum of DC-TS.
